# Supplementary material
Source: PubMed Central journal article supplement (PMC3220779)

## SUPPLEMENTS

*Fig. 1. Structure of sphingosine kinase-2 inhibitor ABC294640*

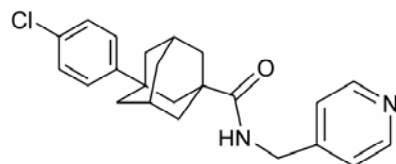

ABC294640

Fig. 1. Shi *et al.*

Supplement: NIHMS311576-supplement-01.pdf [file NIHMS311576-supplement-01.pdf]
